# Supplementary material for: Lessons Learned from POCUS Instruction in Undergraduate Medicine During the COVID-19 Pandemic
Source: PubMed Central journal article supplement (PMC10155734; doi:10.24908/pocus.v8i1.16410), 2023-04-26
Supplement: pocusj-08-16410-s001.pdf [file pocusj-08-16410-s001.pdf]

# POCUS Study 2020 Assessment Sheet

Student Name: \_\_\_\_\_

Assessor Name: \_\_\_\_\_

Pre Test / Post Test (circle one)

|                                                                                                                                             | Parasternal Long Axis                                                                                                                                                                                                                  | Anterior Pleura / Lung                                                                                                                                                                                     | Right Upper Quadrant                                                                                                                                                                                                          |
|---------------------------------------------------------------------------------------------------------------------------------------------|----------------------------------------------------------------------------------------------------------------------------------------------------------------------------------------------------------------------------------------|------------------------------------------------------------------------------------------------------------------------------------------------------------------------------------------------------------|-------------------------------------------------------------------------------------------------------------------------------------------------------------------------------------------------------------------------------|
| <b>Please obtain a POCUS _____ view. You will have ~2 minutes. Verbalize your actions and notify your assessor when you have your view.</b> |                                                                                                                                                                                                                                        |                                                                                                                                                                                                            |                                                                                                                                                                                                                               |
| <b>Transducer Choice</b><br>Correct transducer for this examination                                                                         | Phased array probe<br><input type="checkbox"/> Incorrectly Performed<br><input type="checkbox"/> Correctly Performed                                                                                                                   | Any probe<br><input type="checkbox"/> Incorrectly Performed<br><input type="checkbox"/> Correctly Performed                                                                                                | Curvilinear / phase-array<br><input type="checkbox"/> Incorrectly Performed<br><input type="checkbox"/> Correctly Performed                                                                                                   |
| <b>Probe Placement</b><br>Probe was placed in the correct initial anatomical location                                                       | (left parasternal 2-5th intercostal space with indicator pointed towards the right shoulder)<br><input type="checkbox"/> Incorrect Location<br><input type="checkbox"/> Partially Correct<br><input type="checkbox"/> Correct Location | (anterior chest, indicator to head, perpendicular to chest wall)<br><input type="checkbox"/> Incorrect Location<br><input type="checkbox"/> Partially Correct<br><input type="checkbox"/> Correct Location | (posterior axillary line 8-11 ribs, indicator cephalad angled posteriorly slightly)<br><input type="checkbox"/> Incorrect Location<br><input type="checkbox"/> Partially Correct<br><input type="checkbox"/> Correct Location |
| <b>Knobology</b><br>Presets, depth and gain were adjusted appropriately for the image                                                       | <input type="checkbox"/> Incorrect optimization<br><input type="checkbox"/> Some errors<br><input type="checkbox"/> Adequate optimization                                                                                              | <input type="checkbox"/> Incorrect optimization<br><input type="checkbox"/> Some errors<br><input type="checkbox"/> Adequate optimization                                                                  | <input type="checkbox"/> Incorrect optimization<br><input type="checkbox"/> Some errors<br><input type="checkbox"/> Adequate optimization                                                                                     |
| <b>Image Quality</b><br>Are students generating the image asked of them                                                                     | <input type="checkbox"/> No image<br><input type="checkbox"/> Poor image<br><input type="checkbox"/> Adequate image<br><input type="checkbox"/> Good image<br><input type="checkbox"/> Optimal image                                   | <input type="checkbox"/> No image<br><input type="checkbox"/> Poor image<br><input type="checkbox"/> Adequate image<br><input type="checkbox"/> Good image<br><input type="checkbox"/> Optimal image       | <input type="checkbox"/> No image<br><input type="checkbox"/> Poor image<br><input type="checkbox"/> Adequate image<br><input type="checkbox"/> Good image<br><input type="checkbox"/> Optimal image                          |
| <b>Please describe three structures on your view - if no view is obtained, please describe three structures on an optimal view</b>          |                                                                                                                                                                                                                                        |                                                                                                                                                                                                            |                                                                                                                                                                                                                               |
| <b>Basic Knowledge</b><br>Student was able to describe three structures visualized on their screen / what would optimally be seen           | (RV, LV, LA, LVOT, aortic valve, interventricular septum)<br><input type="checkbox"/> 1 or 0 structures<br><input type="checkbox"/> 2 Structures named<br><input type="checkbox"/> 3 Correct structures                                | (ribs, pleura, lung, soft tissue, rib shadows, A-lines)<br><input type="checkbox"/> 1 or 0 structures<br><input type="checkbox"/> 2 Structures named<br><input type="checkbox"/> 3 Correct structures      | (diaphragm, liver, kidney, hepatorenal space, spine)<br><input type="checkbox"/> 1 or 0 structures<br><input type="checkbox"/> 2 Structures named<br><input type="checkbox"/> 3 Correct structures                            |
| <b>Gel and Hygiene</b><br>Adequate gel, probe hygiene was used prior and after examination                                                  | <input type="checkbox"/> Inadequate gel, no probe hygiene<br><input type="checkbox"/> Some errors in probe hygiene / gel<br><input type="checkbox"/> Correct use of gel and probe hygiene                                              |                                                                                                                                                                                                            |                                                                                                                                                                                                                               |
